# Supplementary material for: Hedgehog signalling mediates drug resistance through targeting TAP1 in hepatocellular carcinoma
Source: PubMed Central journal article supplement (PMC7171417; doi:10.1111/jcmm.15090), 2020-02-28

# **Hedgehog Signaling Mediates Drug Resistance through Targeting TAP1 in Hepatocellular Carcinoma**

Xiao-Tian Zhou<sup>1</sup>, Jia Ding<sup>2\*</sup>, Hui-Yan Li<sup>1</sup>, Jie-Liang Zuo<sup>3</sup>, Sheng-Yang Ge<sup>3</sup>, Hu-Liang Jia<sup>3\*</sup>, Jian  
Wu<sup>1,4,5\*</sup>

<sup>1</sup>Department of Medical Microbiology and Parasitology, MOE/NHC/CAMS Key Laboratory of Medical Molecular Virology, School of Basic Medical Sciences, Shanghai Medical College, Fudan University, Shanghai 200032, China

<sup>2</sup>Department of Gastroenterology, Shanghai Jing'an District Central Hospital, Fudan University, Shanghai 200040, China

<sup>3</sup>Department of General Surgery, Huashan Hospital of Fudan University, Shanghai 200040, China

<sup>4</sup>Department of Gastroenterology & Hepatology, Zhongshan Hospital of Fudan University, Shanghai 200032, China

<sup>5</sup>Shanghai Institute of Liver Diseases, Shanghai Medical College, Fudan University, Shanghai 200032, China

## **\*Corresponding Authors:**

**Jian Wu, MD, PhD, FAASLD**

Email: jian.wu@fudan.edu.cn

**Jia Ding, MD, PhD**

Email: jiading12@fudan.edu.cn

**Huliang Jia, MD, PhD**

Email: jbl-1@163.com

## SUPPLEMENTAL INFORMATION

### RESULTS

#### **Inhibition of Hh transcription factors GLI1/2 improved drug sensitivity in poorly-differentiated hepatoma cells**

Given the fact that Hh signaling transcription factor GLI2 regulates drug sensitivity through ABCC1 transporter in our previous study [1], three hepatoma cells were treated with a GLI antagonist, GANT61, at 1.25, 2.5, 5, 10, 20, 40  $\mu\text{M}$  for 24 hrs to inhibit transcription activity of GLI1/2. As shown in **Suppl. Fig. 2A-C**, GANT61 at 5  $\mu\text{M}$  did not affect cell viability of Huh-7-trans, Huh-7-DN and HLE cells. A combined treatment of GANT61 at 5  $\mu\text{M}$  with doxorubicin resulted in 25~30 % decrease in viability of all three hepatoma cells, and IC<sub>50</sub> was remarkably shifted from 80.98 to 6.41  $\mu\text{M}$  in Huh-7-trans cells, 50.84 to 6.05  $\mu\text{M}$  in Huh-7-DN cells, and 30.74 to 8.19  $\mu\text{M}$  in HLE cells. Compared to cisplatin monotherapy, combination of GANT61 with Sorafenib led to a significant decrease in viability, and corresponding IC<sub>50</sub> was diminished from 81.36 to 41.39  $\mu\text{M}$  in Huh-7-trans cells, 113.3 to 25.92  $\mu\text{M}$  in Huh-7-DN cells, and 82.47 to 43.37  $\mu\text{M}$  in HLE cells (**Suppl. Fig. 2D-I**).

## REFERENCES

1. **Ding J, Zhou XT, Zou HY, et al.** Hedgehog signaling pathway affects the sensitivity of hepatoma cells to drug therapy through the ABCC1 transporter. *Lab Invest* 2017;97:819-832.
2. **Scheuer PJ.** Classification of chronic viral hepatitis: a need for reassessment. *J Hepatol* 1991;13:372-374.
3. **Edmondson HA, Steiner PE.** Primary carcinoma of the liver: a study of 100 cases among 48,900 necropsies. *Cancer* 1954;7:462-503.

## SUPPLEMENTARY TABLES

**Supplementary Table 1 Primer sequences for Quantitative RT-PCR**

| <b>GENE</b> | <b>Forward Sequence (5'-3')</b> | <b>Reverse Sequence (5'-3')</b> | <b>Length (bp)</b> |
|-------------|---------------------------------|---------------------------------|--------------------|
| ABCG4       | ATCTTGGCAGGATAC                 | TAGCAGGACATCTTG                 | 95                 |
| AFP         | CTTTGGGCTGCTCGCTATGA            | GCATGTTGATTTAACAAGCTGCT         | 131                |
| BCL2        | TGTGTGGAGAGCGTCAAC              | G TTCAGGTACTCAGTCATCC           | 75                 |
| CEBPA       | CATCTGCGAGCACGAGAC              | AGGAACTCGTCGTTGAAG              | 72                 |
| CYP2C9      | ACAACCAACCATCTGAAT              | AGGAGAAGGAGAGCATAT              | 112                |
| FGF1        | TTCACAGCCCTGACCGAGAA            | CGTTGCTACAGTAGAGGAGTTTG         | 76                 |
| FGF5        | CACTGATAGGAACCCTAGAGGC          | CAGATGGAAACCGATGCCC             | 196                |
| GAPDH       | GAAGATGGTGATGGGATTTC            | GAAGGTGAAGGTCGGAGTC             | 226                |
| GLI1        | ACAGAAGGACTGTCTGGCCCGC          | TCGGTGCAGCTGTTGGTCTC            | 98                 |
| GLI2        | GTAAGCAGGAGGCTGAGGTG            | GGATGTGCTCGTTGTTGATG            | 114                |
| GSTA1       | CTGCCCGTATGTCCACCTG             | AGCTCCTCGACGTAGTAGAGA           | 185                |
| GSTA2       | CTCCACTACTCCAATATAC             | CCATCAATCTCAACCATT              | 167                |
| MMP1        | AAAATTACACGCCAGATTTGCC          | GGTGTGACATTACTCCAGAGTTG         | 82                 |
| PDGFB       | GCGGAAGAAGCCAAT                 | CTGCCACTGTCTCAC                 | 77                 |
| PDGFRB      | AGACACGGGAGAATACTTTTGC          | AGTTCCTCGGCATCATTAGGG           | 126                |
| S100A4      | CCTGGATGTGATGGTGTC              | CTCCTTTAGTTCTGACTTGTG           | 85                 |
| SERPINE1    | ACCGCAACGTGGTTTTTCTCA           | TTGAATCCCATAGCTGCTTGAAT         | 109                |
| SOHLH2      | GCTTCCTCAATTATCTGCCAGG          | CCCACAGTGACATCTCCAAC            | 86                 |
| TAP1        | CGCCTCACTGACTGGATTCTA           | TCTGTTGGAAAACTCCGTCTC           | 208                |
| TGFB1       | CTAATGGTGGAAACCCACAACG          | TATCGCCAGGAATTGTTGCTG           | 209                |
| TWIST1      | GTCCGCAGTCTTACGAGGAG            | GCTTGAGGGTCTGAATCTTGCT          | 156                |
| UGT1A1      | CATGCTGGGAAGATACTGTTGAT         | GCCCGAGACTAACAAAAGACTCT         | 214                |
| VEGFC       | GAGGAGCAGTTACGGTCTGTG           | TCCTTTCCTTAGCTGACACTTGT         | 96                 |
| WNT5B       | GCTTCTGACAGACGCCAACT            | CACCGATGATAAACATCTCGGG          | 77                 |

**Supplementary Table 2 Primary antibodies for Western blot assay, IHC and ChIP**

| <b>Antibody</b> | <b>Company</b>                              | <b>Application</b>                         |
|-----------------|---------------------------------------------|--------------------------------------------|
| ACTIN           | Proteintech, Wuhan, Hubei, China            | Western blot                               |
| GAPDH           | Proteintech, Wuhan, Hubei, China            | Western blot                               |
| GLI1            | Cell Signaling Technology, Danvers, MA, USA | ChIP & Western blot (for cell experiments) |
| GLI1            | Novus Biologicals, Centennial, CO, USA      | Western blot (for HCC specimens)           |
| GLI2            | Abcam, Cambridge, UK                        | ChIP                                       |
| GLI2            | Novus Biologicals, Centennial, CO, USA      | Western blot                               |
| TAP1            | Abcam, Cambridge, UK                        | Immunohistochemical staining               |
| TAP1            | Cell Signaling Technology, Danvers, MA, USA | Western blot                               |

### Supplementary Table 3 shRNA sequences

| <b>GENE</b> | <b>Sense sequence (5'-3')</b> | <b>Antisense sequence (5'-3')</b> | <b>Region</b> |
|-------------|-------------------------------|-----------------------------------|---------------|
| TAP1        | CCGTGTGTACTTATCCTGGAT         | ATCCAGGATAAGTACACACGG             | CDS           |
| GLI1        | CCTGATTATCTTCCTTCAGAA         | TTCTGAAGGAAGATAATCAGG             | CDS           |
| Scrambled   | CCTAAGGTTAAGTCGCCCTCG         | CGAGGGCGACTTAACCTTAGG             |               |

**CDS**, Coding sequence.

**Supplementary Table 4 Primer sequences of putative binding sequence of GLI1/2 within the TAP1 promoter incorporation into the reporter system**

| <b>TAP1 promoter constructs</b> | <b>Primer sequences (5'-3')</b>                         | <b>Product position and size</b>  |
|---------------------------------|---------------------------------------------------------|-----------------------------------|
| pGL4.23-TAP1_a                  | F: TTCCTTCTCCCAAGTGCTGTTC<br>R: GGGTCTGGGCTTGAGGGTT     | NG_011759.1:4277-4677<br>(401 bp) |
| pGL4.23-TAP1_b                  | F: GGGACCAGAGTGAAAGCGAAAG<br>R: CAACCCGCAATGAGCATAGAGTA | NG_011759.1:4381-4546<br>(166 bp) |
| pGL4.23-TAP1_c                  | F: TCTATGCTCATTGCGGGTTGC<br>R: GGGTAATGGGTCTGGGCTTG     | NG_011759.1:4527-4685<br>(159 bp) |

**Supplementary Table 5 Demographic information of HCC patients**

| Experimental #                                                | 1               | 2               | 3               | 4               | 5                                  | 6                                     | 7                                  | 8                                         | 9               | 10                               | 11                                 | 12                                 |
|---------------------------------------------------------------|-----------------|-----------------|-----------------|-----------------|------------------------------------|---------------------------------------|------------------------------------|-------------------------------------------|-----------------|----------------------------------|------------------------------------|------------------------------------|
| Gender                                                        | M               | M               | F               | M               | M                                  | F                                     | F                                  | M                                         | M               | M                                | M                                  | M                                  |
| Age                                                           | 54              | 60              | 61              | 63              | 69                                 | 75                                    | 75                                 | 51                                        | 47              | 61                               | 57                                 | 71                                 |
| Alcohol Intake<br>>150<br>g/d for<br>25 yr                    | Y               | N               | N               | N               | N                                  | N                                     | N                                  | N                                         | N               | N                                | N                                  | N                                  |
| Base Liver Disease <sup>a</sup>                               | CHB<br>-G2S4    | CH<br>-G1S4     | CHB<br>-G1S4    | CHB<br>-G1S0    | CHB<br>-G1S4                       | CH<br>-G0S0                           | G2S4                               | CHB<br>-G3S4                              | CHB<br>-G0S3    | Hepatic<br>steatosis<br>(33-66%) | CHB<br>-G2S4                       | CHB<br>-G2S1                       |
| Clinical Diagnosis                                            | Liver<br>cancer | Liver<br>cancer | Liver<br>cancer | Liver<br>cancer | Relapse<br>post<br>-HCC<br>surgery | Post<br>HCC<br>surgery<br>and<br>TACE | Relapse<br>post<br>-HCC<br>surgery | Liver<br>cancer,<br>cirrhosis<br>post CHB | Liver<br>cancer | Liver<br>cancer                  | Relapse<br>post<br>-HCC<br>surgery | Relapse<br>post<br>-HCC<br>surgery |
| TNM Classification                                            | T1N0<br>M0      | T2N0<br>M0      | T1N0<br>M0      | T2N0<br>M0      | T2N0<br>M0                         | T2N0M0                                | T2N0<br>M0                         | T4N0M0                                    | T2bN<br>0M0     | T1N0M0                           | T4NXM0                             | T1N0<br>M0                         |
| Pathologic Diagnosis<br>Histopathologic<br>Grade <sup>b</sup> | HCC<br>III      | HCC<br>II       | HCC<br>II       | HCC<br>III-IV   | HCC<br>III                         | HCC<br>II                             | HCC<br>II                          | HCC<br>II                                 | HCC<br>II       | HCC<br>II                        | HCC<br>III                         | HCC<br>III                         |
| MVI<br>Within Hepatic<br>Metastasis                           | M2<br>N         | M2<br>Y         | M0<br>N         | M1<br>N         | M2<br>Y                            | M1<br>Y                               | M1<br>N                            | M2<br>N                                   | M1<br>N         | M0<br>N                          | M2<br>Y                            | M3<br>N                            |
| Portal Vein Invasion<br>(Y/N)                                 | Y               | Y               | N               | Y               | Y                                  | Y                                     | Y                                  | Y                                         | Y               | N                                | Y                                  | Y                                  |
| Adjacent Tissue<br>Invasion                                   | N               | N               | N               | N               | N                                  | Y                                     | N                                  | N                                         | N               | N                                | Y                                  | N                                  |



| Experimental #                 | 1     | 2      | 3     | 4              | 5      | 6             | 7     | 8    | 9      | 10     | 11        | 12  |      |
|--------------------------------|-------|--------|-------|----------------|--------|---------------|-------|------|--------|--------|-----------|-----|------|
| Invasion Organ                 |       |        |       |                |        | Adrenal gland |       |      |        |        | Diaphragm |     |      |
| Distal Organ                   | N     | N      | N     | N              | N      | N             | N     | N    | N      | N      | N         | N   |      |
| Metastasis                     |       |        |       |                |        |               |       |      |        |        |           |     |      |
| Relapsed (y/n)                 | N     | N      | N     | N              | Y      | Y             | Y     | N    | N      | N      | Y         | Y   |      |
| Secondary Resection (Y/N)      | N     | N      | N     | N              | Y      | N             | Y     | N    | N      | N      | Y         | Y   |      |
| AFP (ng/ml)                    | <10   | 302.58 | 223.5 | 1.82           | 185    | 3184.9        | 466.2 | 2.57 | 4502.7 | 1430.5 | 2.1       | 620 | 1.94 |
| HBsAg                          | +     | -      | +     | +              | +      | -             | +     | +    | -      | -      | +         | +   |      |
| HBsAb                          | -     | -      | -     | +              | +      | -             | -     | -    | -      | +      | -         | -   |      |
| HBeAg                          | -     | -      | -     | -              | -      | -             | -     | -    | -      | -      | +         | -   |      |
| HBeAb                          | +     | +      | -     | -              | +      | +             | +     | +    | +      | -      | -         | +   |      |
| HBcAb                          | +     | +      | +     | +              | +      | +             | +     | +    | +      | +      | +         | +   |      |
| HCV-Ab                         | -     | -      | -     | -              | -      | -             | -     | -    | -      | -      | -         | -   |      |
| HBV-DNA                        | /     | /      | /     | U <sup>c</sup> | U      | U             | U     | U    | U      | U      | U         | U   |      |
| Staining of Resected Specimens | CK18  | +      | +     | +              | +      | +             | +     | +    | +      | +      | +         | +   |      |
|                                | CK19  | +      | -     | -              | focal+ | +             | /     | -    | few+   | -      | Cholangio | -   |      |
|                                | HEP1  | -      | +     | few+           | -      | -             | -     | +    | -      | +      | +         | +   |      |
|                                | GPC-3 | +      | +     | +              | +      | +             | /     | -    | +      | -      | -         | +   |      |

Footnotes:

a. Base liver disease: Scheuer scoring system [2], CHB: Chronic Hepatitis B. G: for necroinflammatory activity in chronic hepatitis; S: scoring system for fibrosis and cirrhosis.

b. Histopathologic Edmondson-Steiner grade [3].

c. U: under detectable limit.

TACE= transarterial chemoembolization

MVI = Microvascular invasion

GPC-3 = Glypican-3

Hep1= Hepatocyte paraffin 1

CK18 = Cytokeratin 18

CK19 = Cytokeratin 19

TNM = Tumor, Nodes, Metastasis

## SUPPLEMENTARY FIGURE LEGENDS

**Supplementary Fig. 1** Representative of differential gene expression levels of hepatocyte-specific genes (**A, B**), drug-resistance (**C**) and cancer progressive genes (**D-H**) verified by quantitative RT-PCR using Huh-7 cells as controls (n = 3). \*  $p < 0.05$ ; \*\*  $p < 0.01$ .

**Supplementary Fig. 2** Cell viability and chemosensitivity of Huh-7-trans, Huh-7-DN and HLE cells exposed to chemotherapeutic agents with/without GANT61. Cell viability of Huh-7-trans (**A**), Huh-7-DN (**B**) and HLE (**C**) cells exposed to GANT61. Chemosensitivity of Huh-7-trans, Huh-7-DN and HLE cells exposed to doxorubicin or cisplatin with/without GANT61 5  $\mu$ M for 24 hours determined by MTT assay (**D-I**). n = 3, \*  $p < 0.05$ ; \*\*  $p < 0.01$ .

Supplementary Fig. 1

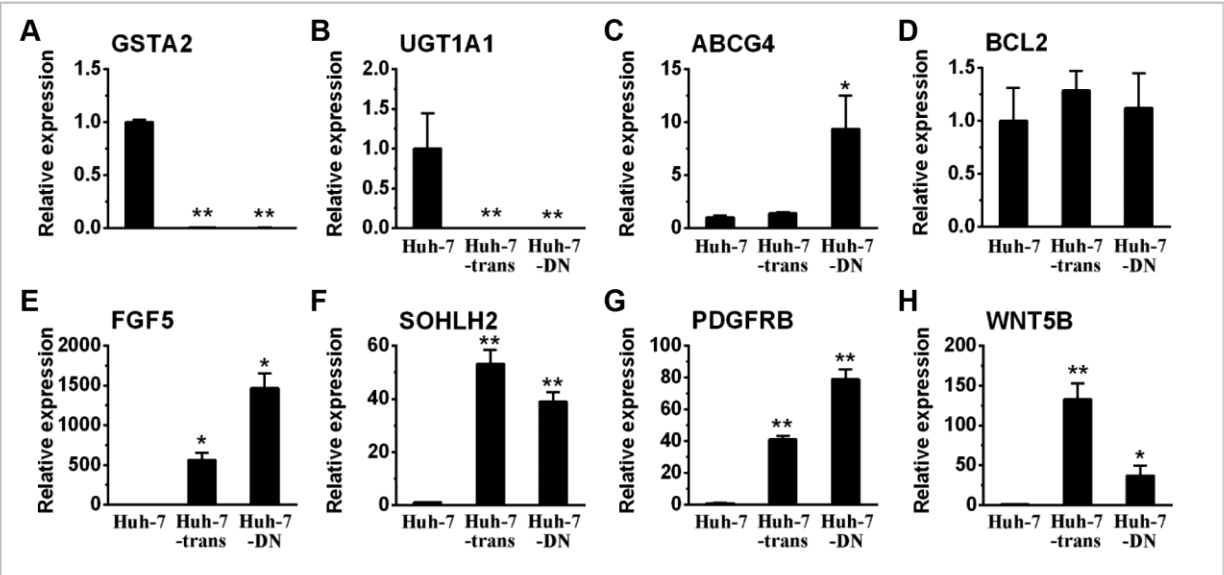

Supplementary Fig. 2

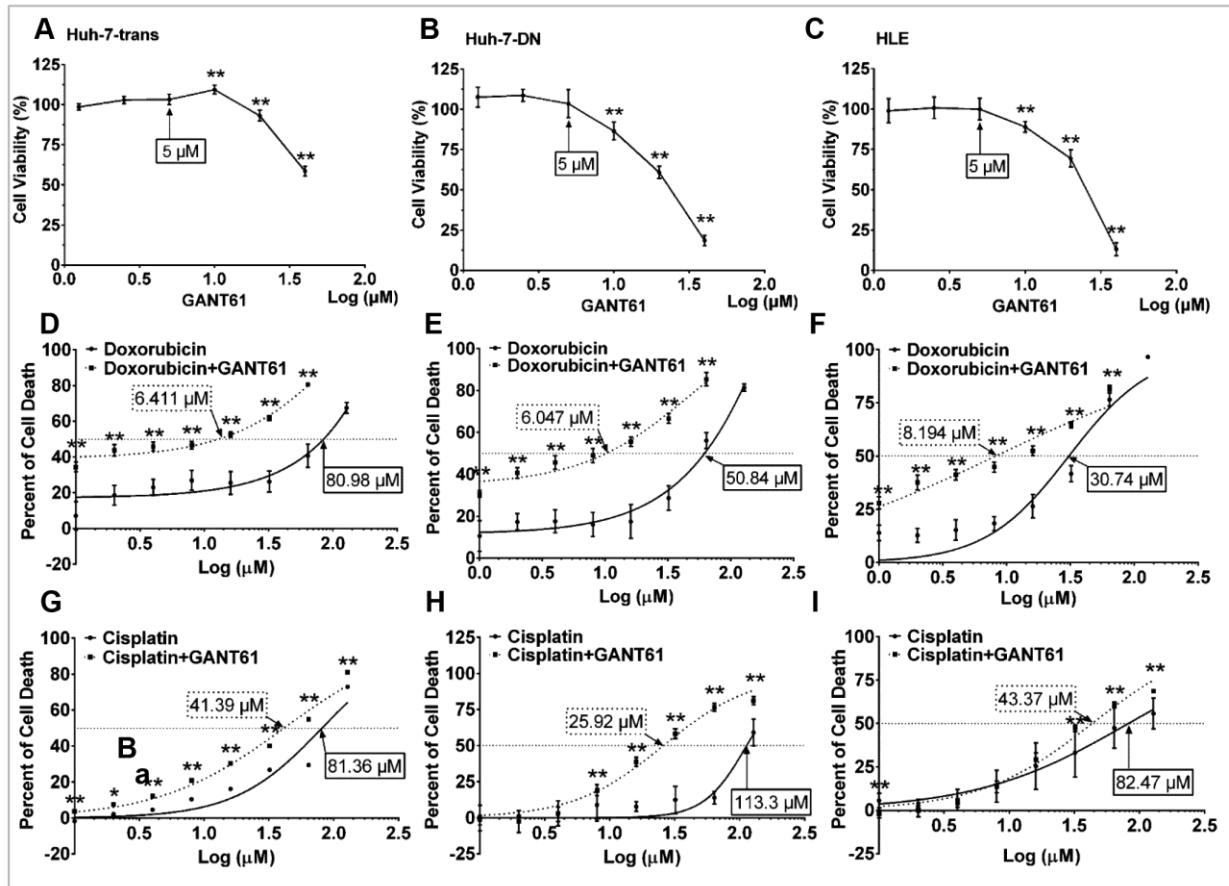

Supplement: JCMM-24-4298-s001.pdf [file JCMM-24-4298-s001.pdf]
